# Supplementary material
Source: PubMed Central journal article supplement (PMC6882135)
Supplement: ao9b02808_si_001.pdf [file ao9b02808_si_001.pdf]

# A continuous activity assay for HDAC11 enabling re-evaluation of HDAC inhibitors

Zsófia Kutil<sup>1</sup>, Jana Mikešová<sup>1</sup>, Matthes Zessin<sup>2</sup>, Marat Meleshin<sup>3</sup>, Zora Nováková<sup>1</sup>, Glenda Alquicer<sup>1</sup>, Alan Kozikowski<sup>4</sup>, Wolfgang Sippl<sup>2</sup>, Cyril Bařinka<sup>1\*</sup> and Mike Schutkowski<sup>3\*</sup>

<sup>1</sup>Institute of Biotechnology CAS, BIOCEV, Prumyslova 595, 252 50 Vestec, Czech Republic

<sup>2</sup>Department of Medicinal Chemistry, Institute of Pharmacy, Martin-Luther-University Halle-Wittenberg, 06120 Halle/Saale, Germany

<sup>3</sup>Department of Enzymology, Institute of Biochemistry and Biotechnology, Charles Tanford Protein Centre, Martin Luther University Halle-Wittenberg, Kurt-Mothes-Straße 3a, 06120 Halle (Saale), Germany

<sup>4</sup>StarWise Therapeutics LLC, 505 S Rosa Road, Suite 27, Madison, Wisconsin 53719-1235

## **Supplementary Material contain:**

Supplementary table 1 - 3

Supplementary figures 1 - 6

Supplementary references

## Supplementary tables

**Table S1.** The activity of selected inhibitors against HDAC6, 8 and 1 reported in the literature

| Compound                   | Inhibitor class       | IC <sub>50</sub> HDAC6                                                         | IC <sub>50</sub> HDAC8                                                         | IC <sub>50</sub> HDAC1                                                                             |
|----------------------------|-----------------------|--------------------------------------------------------------------------------|--------------------------------------------------------------------------------|----------------------------------------------------------------------------------------------------|
| Dacinostat (NVP-LAQ824)    | hydroxamic acids      | 5,93 <sup>1</sup>                                                              | 3,84 <sup>1</sup>                                                              | 3,23 <sup>1</sup>                                                                                  |
| Elevenostat (JB3-22)       | hydroxamic acids      |                                                                                |                                                                                |                                                                                                    |
| Fimepinostat (CUDC-907)    | hydroxamic acids      | 27 <sup>2</sup>                                                                | 191 <sup>2</sup>                                                               | 1,7 <sup>2</sup>                                                                                   |
| FT895                      |                       | >10000 <sup>3</sup>                                                            | 5600 <sup>3</sup>                                                              | >10000 <sup>3</sup>                                                                                |
| Mocetinostat (MGCD0103)    | Benzamides            | inactive <sup>4*</sup>                                                         | inactive <sup>4</sup>                                                          | 150 <sup>5</sup> ; 9,26 <sup>4</sup>                                                               |
| Pracinostat (SB939)        | Hydroxamic acids      | 1008 <sup>6</sup>                                                              | 140 <sup>6</sup>                                                               | 49 <sup>6</sup>                                                                                    |
| Quisinostat (JNJ-26481585) | Hydroxamic acids      | 76,8 <sup>4</sup>                                                              | 4,26 <sup>4</sup>                                                              | 0,11 <sup>4</sup>                                                                                  |
| Ricolinostat (ACY1215)     | Hydroxamic acids      | 9 <sup>7</sup> ;4,7 <sup>8</sup>                                               | 254 <sup>7</sup> ;100 <sup>8</sup>                                             | 38 <sup>7</sup> ; 58 <sup>8</sup>                                                                  |
| Romidepsin (FK228)         | Cyclic peptides       | >1000 <sup>9</sup> ; 1220 <sup>10</sup>                                        | >1000 <sup>9</sup> ; >10000 <sup>10</sup>                                      | 0,8 <sup>9</sup> ; 1050 <sup>10</sup>                                                              |
| SAHA                       | Hydroxamic acids      | 165 <sup>6</sup> ; 5500 <sup>11</sup> ; 15 <sup>7</sup> ; 28,6 <sup>1</sup>    | 326 <sup>6</sup> ; 6,8 <sup>11</sup> ; 172 <sup>7</sup> ; 243 <sup>1</sup>     | 110 <sup>6</sup> ; 13,7 <sup>11</sup> ; 11 <sup>7</sup> ; 258 <sup>1</sup>                         |
| Trapoxin A                 | Cyclic peptides       | 524 <sup>12</sup>                                                              |                                                                                | 0,82 <sup>12</sup>                                                                                 |
| Trichostatin A             | Hydroxamic acids      | 0,9 <sup>13</sup> ; 1,1 <sup>14</sup> ; 1,5 <sup>15</sup> ; 0,42 <sup>16</sup> | 129 <sup>13</sup> ; 170 <sup>14</sup> ; 196 <sup>15</sup> ; 89,5 <sup>16</sup> | 8,22 <sup>17</sup> ; 5 <sup>13</sup> ; 9,2 <sup>14</sup> ; 10,9 <sup>15</sup> ; 7,12 <sup>16</sup> |
| Valproate                  | Aliphatic fatty acids | >2000000 <sup>18</sup> ; ND <sup>11</sup>                                      | 103000 <sup>18</sup> ; 756000 <sup>11</sup>                                    | 39000 <sup>18</sup> ;171000 <sup>11</sup>                                                          |

\* inactive - not defined

**Table S2.** Calculated Z' factors and signal to noise ratio of HDAC11 and compound 1.

|                    | 96 well plate | 384 well plate | 1536 well plate |
|--------------------|---------------|----------------|-----------------|
| Z'factor           | 0,95          | 0,88           | 0,77            |
| signal/noise ratio | 425           | 258            | 94              |

**Table S3.**  $K_i$  values for listed inhibitors.  $K_i$ -values were calculated with the Cheng-Prusoff-relationship<sup>19</sup>. The  $K_M$ -value used for the calculation for compound **1** was 12  $\mu$ M and for compound **3** 200  $\mu$ M.

| Compound                   | $K_i$ (nM) lysine derivative 3 | $K_i$ (nM) Peptide 1 |
|----------------------------|--------------------------------|----------------------|
| Dacinostat (NVP-LAQ824)    | 3750                           | 4188                 |
| Elevenostat (JB3-22)       | 6062                           | 7871                 |
| Fimepinostat (CUDC-907)    | 15                             | 10                   |
| Mocetinostat (MGCD0103)    | ND                             | ND                   |
| Nexturastat A              | 7931                           | ND                   |
| Pracinostat (SB939)        | 26705                          | 15476                |
| Quisinostat (JNJ-26481585) | 1681                           | 1454                 |
| Ricolinostat (ACY1215)     | 5125                           | 5444                 |
| Romidepsin (FK228)         | 4577                           | 1198                 |
| Trapoxin A                 | 74                             | 4                    |
| Trichostatin               | 9762                           | 9769                 |
| Valproate                  | ND                             | ND                   |

\* ND means: Not determined due to the low activity ( $IC_{50} > 40000$ )

## Supplementary figures

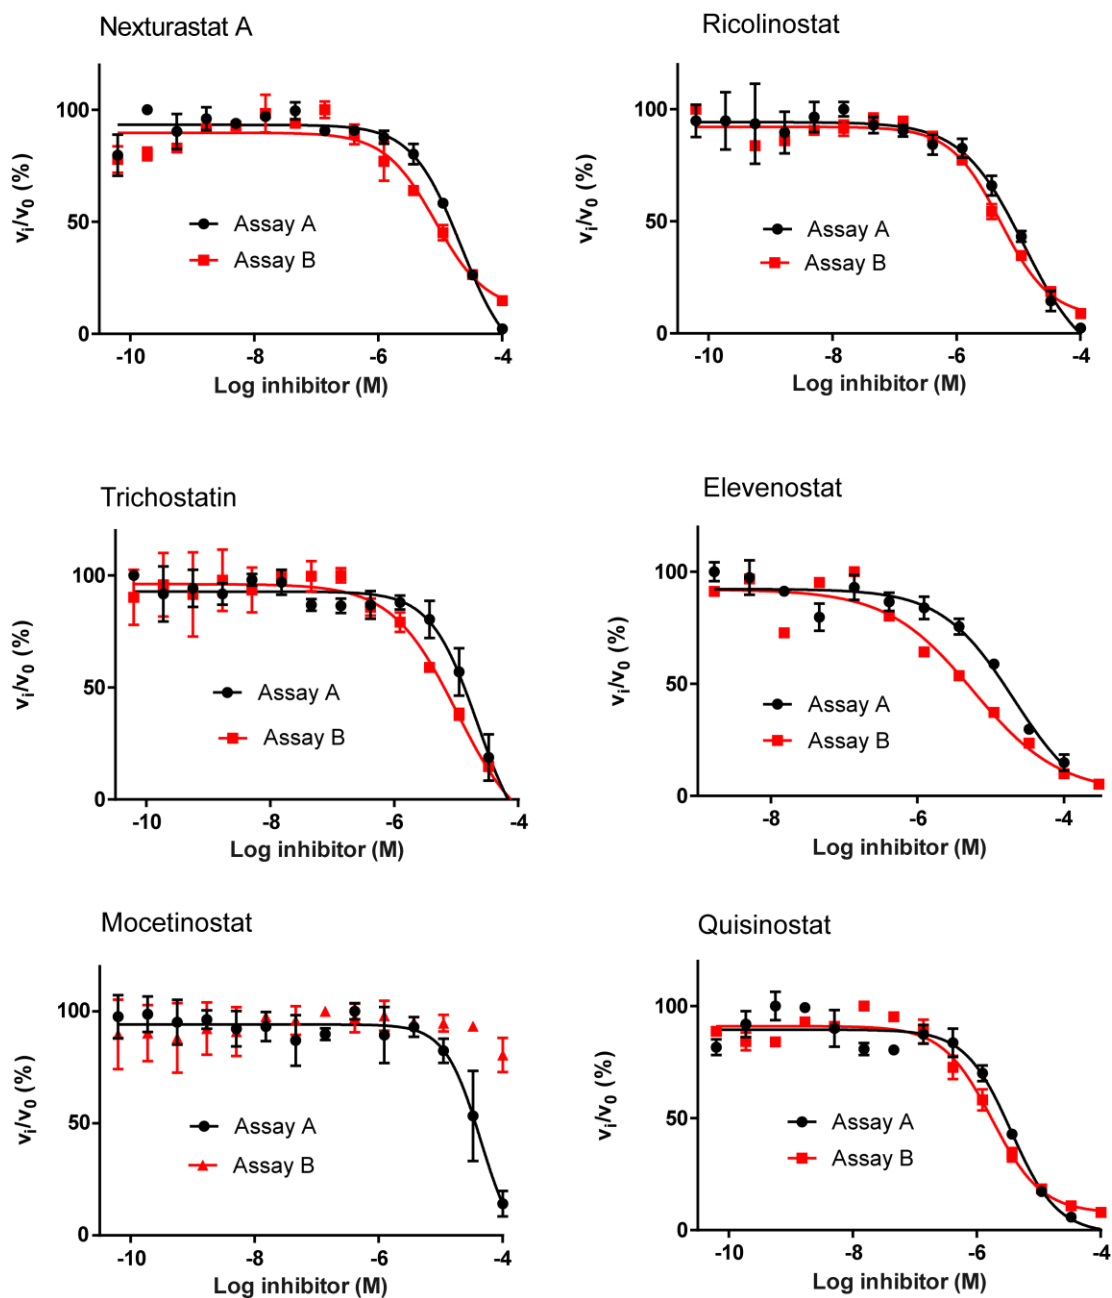

**Supplementary figure S1:** Comparison of dose response curves of selected inhibitors (Nexturastat A, Ricolinostat, Trichostatin, Elevenostat, Mocetinostat and Quisinostat) measured by Assay A (15  $\mu$ M substrate **1**, 20 nM HDAC11) and B (10  $\mu$ M substrate **3**, 60 nM HD11).

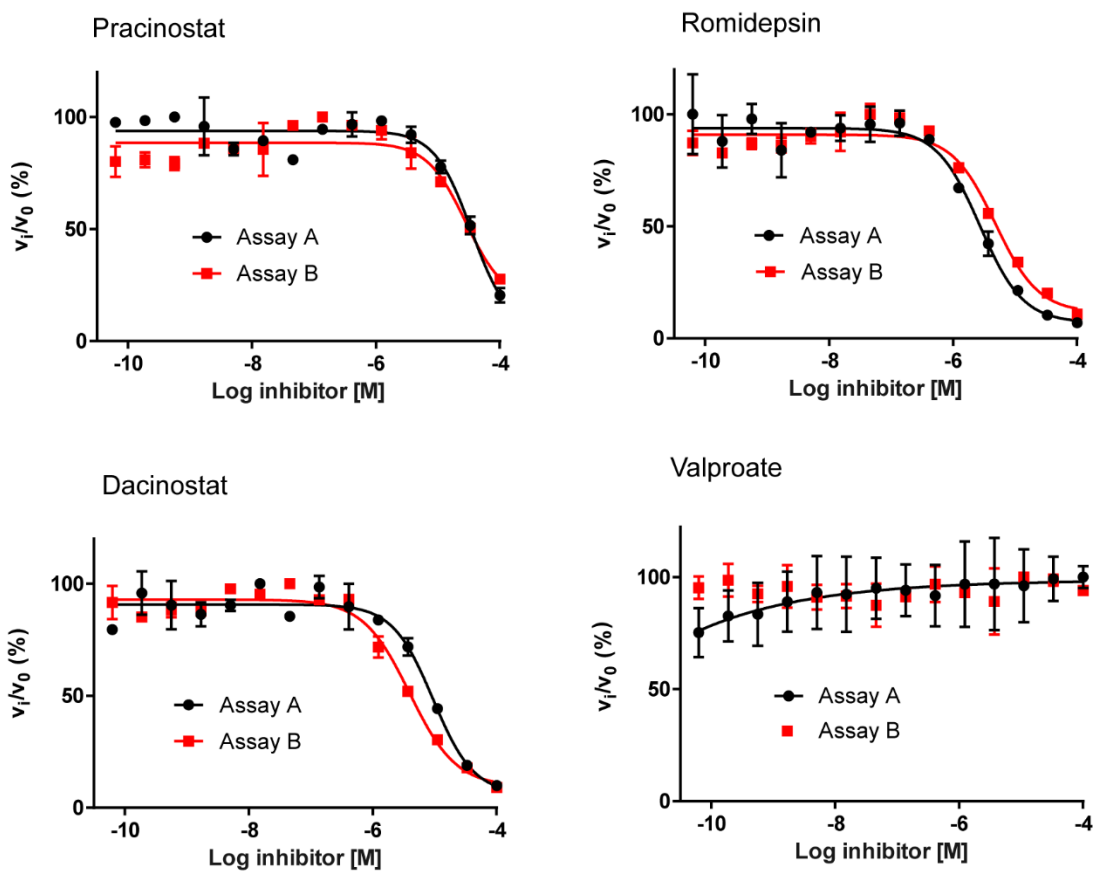

**Supplementary figure S2:** Comparison of dose response curves of selected inhibitors (Pracinostat, Romidepsin, Dacinostat, Valproate) measured by Assay A (15  $\mu$ M substrate **1**, 20 nM HDAC11) and B (10  $\mu$ M substrate **3**, 60 nM HD11).

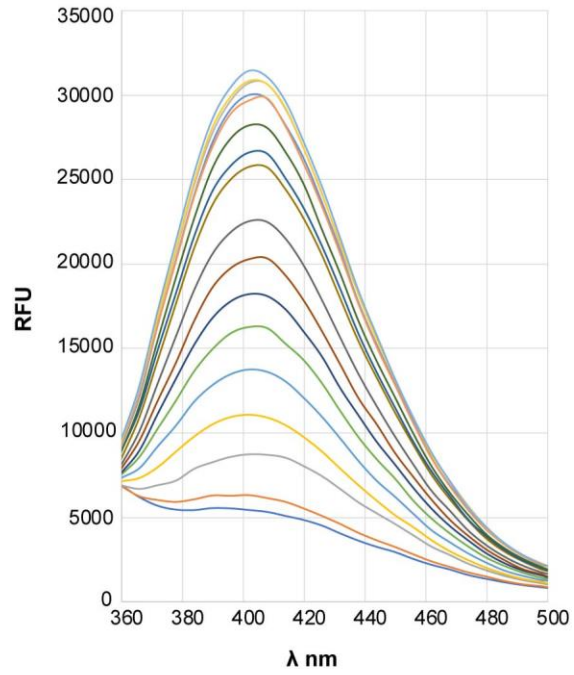

**Supplementary figure S3. Fluorescence measurements using peptide 1.** Emission fluorescence spectra ( $\lambda$  360-500; band width 30) of 15  $\mu$ M substrate **1** excited at 320 nm (band width 20 nm) recorded every 2 minutes after the HDAC11 treatment (enzyme concentration 20 nM).

### compound 1 with 25 nM HDAC11

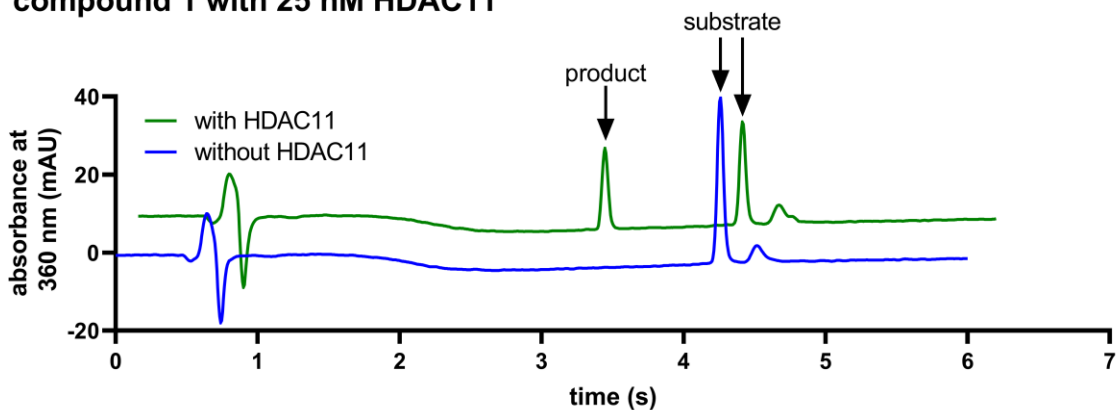

### compound 2 with 500 nM HDAC11

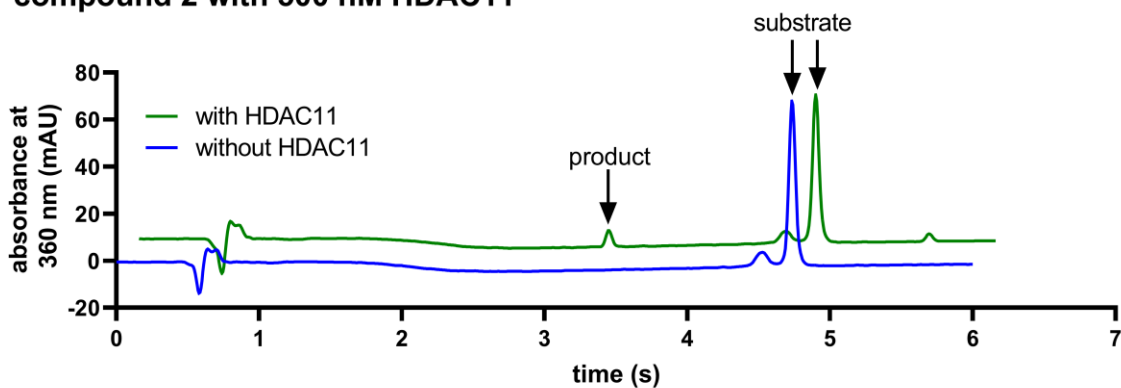

**Supplementary figure S4. HPLC runs of compound 1 and 2 without HDAC11 (blue) and with HDAC11 (green).** The reaction mixture (20  $\mu\text{M}$  peptide dissolved in the assay buffer) was incubated at 37  $^{\circ}\text{C}$  for 1h with 25 nM HDAC11 (compound 1) and with 500 nM HDAC11 (compound 2). The product formation was analyzed by HPLC at an absorbance of 360 nm. The product formation was calculated from the product peak area divided by the total peak area. The negative control was treated like the sample but there was buffer used to start the reaction. The product formation of compound 1 was 8.2  $\mu\text{M}$  (41 %) and 1.3  $\mu\text{M}$  (6 %) of compound 2.

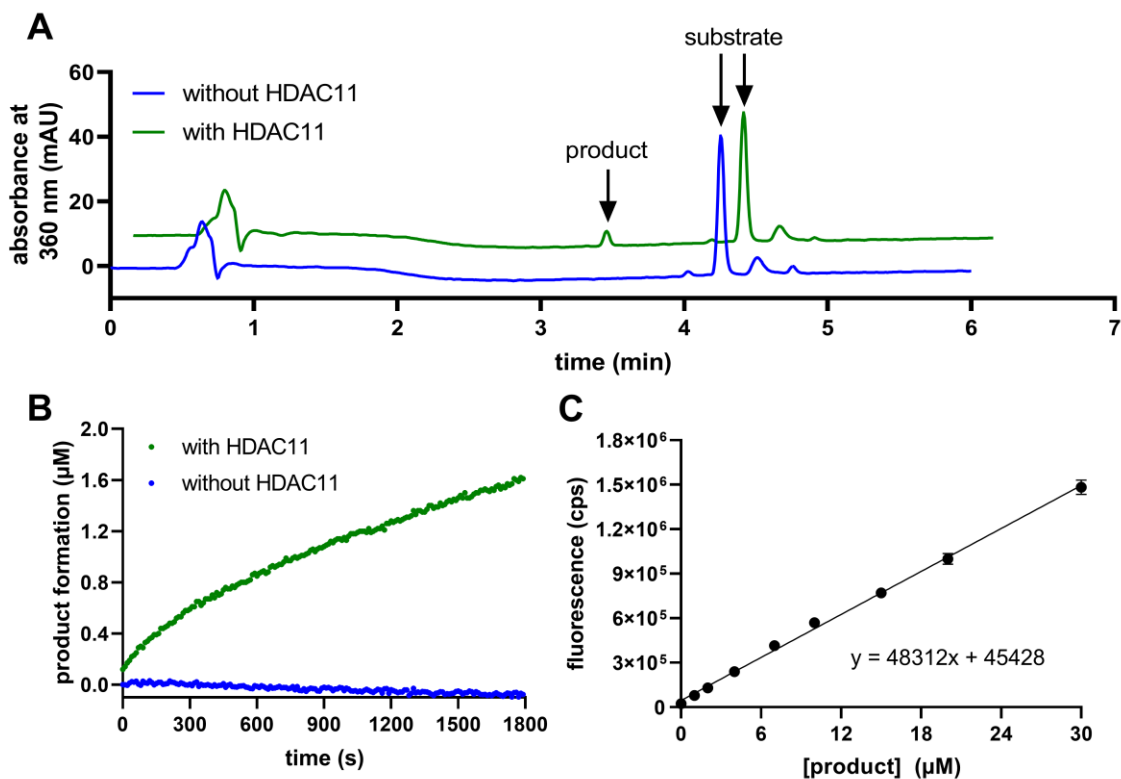

**Supplementary figure S5. Comparison of product formation of compound 1 between Multilabel plate reader and HPLC.** The reaction mixture (peptide 1 dissolved in buffer at 20  $\mu\text{M}$ ) was incubated in 96 well plate for 5 min at 25  $^{\circ}\text{C}$ . HDAC11 was added to the mixture (final concentration 30 nM) and the fluorescence increase was monitored with the plate reader ( $\lambda_{\text{ex}} = 330 \pm 75$  nm and  $\lambda_{\text{em}} = 430 \pm 8$  nm) for 30 min. After that, the reaction was quenched by adding diluted TFA (final concentration 0.5 %) and the mixture was analyzed with HPLC (**A**). The product formation was calculated from the product peak area divided by the total peak area. A calibration line (**C**) was used to calculate the product formation from the change of the fluorescence intensity in  $\mu\text{M}$  (**B**). The product formation calculated from HPLC runs was 1.66  $\mu\text{M}$  (8.3 %) and from fluorescence measurements 1.68  $\mu\text{M}$  (8.4 %).



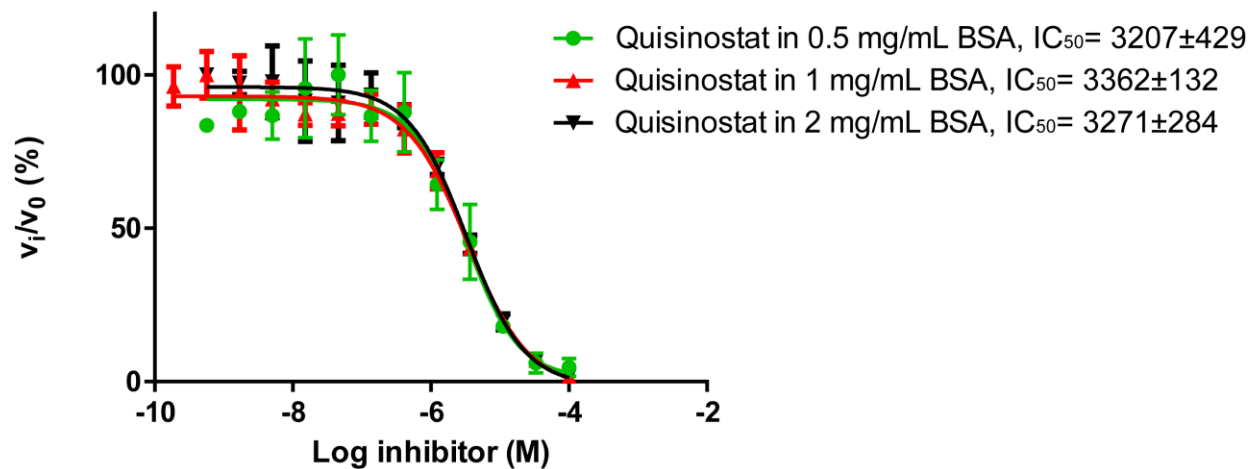

**Supplementary figure S6. The influence of BSA concentration in the assay buffer on inhibitor potency.**

The Quisinostat was selected as a representative of moderately active inhibitors and tested in the assay buffer supplemented with various BSA concentrations (0.5, 1 and 2 mg/mL). No effect of BSA on the  $IC_{50}$  values was observed at BSA concentrations tested.

## Supplementary references

1. Auzzas, L.; Larsson, A.; Matera, R.; Baraldi, A.; Deschenes-Simard, B.; Giannini, G.; Cabri, W.; Battistuzzi, G.; Gallo, G.; Ciacci, A.; Vesce, L.; Pisano, C.; Hanessian, S., Non-natural macrocyclic inhibitors of histone deacetylases: design, synthesis, and activity. *Journal of medicinal chemistry* **2010**, *53* (23), 8387-99.
2. Chen, Y.; Wang, X.; Xiang, W.; He, L.; Tang, M.; Wang, F.; Wang, T.; Yang, Z.; Yi, Y.; Wang, H.; Niu, T.; Zheng, L.; Lei, L.; Li, X.; Song, H.; Chen, L., Development of Purine-Based Hydroxamic Acid Derivatives: Potent Histone Deacetylase Inhibitors with Marked in Vitro and in Vivo Antitumor Activities. *Journal of medicinal chemistry* **2016**, *59* (11), 5488-504.
3. Martin, M. W.; Lee, J. Y.; Lancia, D. R., Jr.; Ng, P. Y.; Han, B.; Thomason, J. R.; Lynes, M. S.; Marshall, C. G.; Conti, C.; Collis, A.; Morales, M. A.; Doshi, K.; Rudnitskaya, A.; Yao, L.; Zheng, X., Discovery of novel N-hydroxy-2-arylisoindoline-4-carboxamides as potent and selective inhibitors of HDAC11. *Bioorganic & medicinal chemistry letters* **2018**, *28* (12), 2143-2147.
4. Arts, J.; King, P.; Marien, A.; Floren, W.; Belien, A.; Janssen, L.; Pilatte, I.; Roux, B.; Decrane, L.; Gilissen, R.; Hickson, I.; Vreys, V.; Cox, E.; Bol, K.; Talloen, W.; Goris, I.; Andries, L.; Du Jardin, M.; Janicot, M.; Page, M.; van Emelen, K.; Angibaud, P., JNJ-26481585, a novel "second-generation" oral histone deacetylase inhibitor, shows broad-spectrum preclinical antitumoral activity. *Clinical cancer research : an official journal of the American Association for Cancer Research* **2009**, *15* (22), 6841-51.
5. Zhou, N.; Moradei, O.; Raepfel, S.; Leit, S.; Frechette, S.; Gaudette, F.; Paquin, I.; Bernstein, N.; Bouchain, G.; Vaisburg, A.; Jin, Z.; Gillespie, J.; Wang, J.; Fournel, M.; Yan, P. T.; Trachy-Bourget, M. C.; Kalita, A.; Lu, A.; Rahil, J.; MacLeod, A. R.; Li, Z.; Besterman, J. M.; Delorme, D., Discovery of N-(2-aminophenyl)-4-[(4-pyridin-3-ylpyrimidin-2-ylamino)methyl]benzamide (MGCD0103), an orally active histone deacetylase inhibitor. *Journal of medicinal chemistry* **2008**, *51* (14), 4072-5.
6. Novotny-Diermayr, V.; Sangthongpitag, K.; Hu, C. Y.; Wu, X.; Sausgruber, N.; Yeo, P.; Greicius, G.; Pettersson, S.; Liang, A. L.; Loh, Y. K.; Bonday, Z.; Goh, K. C.; Hentze, H.; Hart, S.; Wang, H.; Ethirajulu, K.; Wood, J. M., SB939, a novel potent and orally active histone deacetylase inhibitor with high tumor exposure and efficacy in mouse models of colorectal cancer. *Molecular cancer therapeutics* **2010**, *9* (3), 642-52.
7. Yang, Z.; Wang, T.; Wang, F.; Niu, T.; Liu, Z.; Chen, X.; Long, C.; Tang, M.; Cao, D.; Wang, X.; Xiang, W.; Yi, Y.; Ma, L.; You, J.; Chen, L., Discovery of Selective Histone Deacetylase 6 Inhibitors Using the Quinazoline as the Cap for the Treatment of Cancer. *Journal of medicinal chemistry* **2016**, *59* (4), 1455-70.
8. Santo, L.; Hideshima, T.; Kung, A. L.; Tseng, J. C.; Tamang, D.; Yang, M.; Jarpe, M.; van Duzer, J. H.; Mazitschek, R.; Ogier, W. C.; Cirstea, D.; Rodig, S.; Eda, H.; Scullen, T.; Canavese, M.; Bradner, J.; Anderson, K. C.; Jones, S. S.; Raje, N., Preclinical activity, pharmacodynamic, and pharmacokinetic properties of a selective HDAC6 inhibitor, ACY-1215, in combination with bortezomib in multiple myeloma. *Blood* **2012**, *119* (11), 2579-89.
9. Salvador, L. A.; Park, H.; Al-Awadhi, F. H.; Liu, Y.; Kim, B.; Zeller, S. L.; Chen, Q.-Y.; Hong, J.; Luesch, H., Modulation of Activity Profiles for Largazole-Based HDAC Inhibitors through Alteration of Prodrug Properties. *ACS Medicinal Chemistry Letters* **2014**, *5* (8), 905-910.
10. Yao, Y.; Tu, Z.; Liao, C.; Wang, Z.; Li, S.; Yao, H.; Li, Z.; Jiang, S., Discovery of Novel Class I Histone Deacetylase Inhibitors with Promising in Vitro and in Vivo Antitumor Activities. *Journal of medicinal chemistry* **2015**, *58* (19), 7672-80.
11. Huber, K.; Doyon, G.; Plaks, J.; Fyne, E.; Mellors, J. W.; Sluis-Cremer, N., Inhibitors of histone deacetylases: correlation between isoform specificity and reactivation of HIV type 1 (HIV-1) from latently infected cells. *The Journal of biological chemistry* **2011**, *286* (25), 22211-8.

12. Furumai, R.; Komatsu, Y.; Nishino, N.; Khochbin, S.; Yoshida, M.; Horinouchi, S., Potent histone deacetylase inhibitors built from trichostatin A and cyclic tetrapeptide antibiotics including trapoxin. *Proc Natl Acad Sci U S A* **2001**, *98* (1), 87-92.
13. Yu, C. W.; Chang, P. T.; Hsin, L. W.; Chern, J. W., Quinazolin-4-one derivatives as selective histone deacetylase-6 inhibitors for the treatment of Alzheimer's disease. *Journal of medicinal chemistry* **2013**, *56* (17), 6775-91.
14. Muthyala, R.; Shin, W. S.; Xie, J.; Sham, Y. Y., Discovery of 1-hydroxypyridine-2-thiones as selective histone deacetylase inhibitors and their potential application for treating leukemia. *Bioorganic & medicinal chemistry letters* **2015**, *25* (19), 4320-4.
15. Marek, L.; Hamacher, A.; Hansen, F. K.; Kuna, K.; Gohlke, H.; Kassack, M. U.; Kurz, T., Histone deacetylase (HDAC) inhibitors with a novel connecting unit linker region reveal a selectivity profile for HDAC4 and HDAC5 with improved activity against chemoresistant cancer cells. *Journal of medicinal chemistry* **2013**, *56* (2), 427-36.
16. Cincinelli, R.; Musso, L.; Giannini, G.; Zuco, V.; De Cesare, M.; Zunino, F.; Dallavalle, S., Influence of the adamantyl moiety on the activity of biphenylacrylohydroxamic acid-based HDAC inhibitors. *European journal of medicinal chemistry* **2014**, *79*, 251-9.
17. Neelarapu, R.; Holzle, D. L.; Velaparthi, S.; Bai, H.; Brunsteiner, M.; Blond, S. Y.; Petukhov, P. A., Design, synthesis, docking, and biological evaluation of novel diazide-containing isoxazole- and pyrazole-based histone deacetylase probes. *Journal of medicinal chemistry* **2011**, *54* (13), 4350-64.
18. Fass, D. M.; Shah, R.; Ghosh, B.; Hennig, K.; Norton, S.; Zhao, W.-N.; Reis, S. A.; Klein, P. S.; Mazitschek, R.; Maglathlin, R. L.; Lewis, T. A.; Haggarty, S. J., Short-Chain HDAC Inhibitors Differentially Affect Vertebrate Development and Neuronal Chromatin. *ACS Medicinal Chemistry Letters* **2011**, *2* (1), 39-42.
19. Yung-Chi, C.; Prusoff, W. H. Relationship between the inhibition constant (KI) and the concentration of inhibitor which causes 50 per cent inhibition (I50) of an enzymatic reaction. *Biochemical Pharmacology* **1973**, *22*, 3099-3108.
